# Supplementary material for: Addressing the challenges of symbiont-mediated RNAi in aphids
Source: bioRxiv preprint, doi:10.1101/2022.08.28.505609, version 1 (2022-08-28)
Supplement: Source Data [file 505609_file02.xlsx]

## Sheet: Figure_2
Aphid	Stop	Death	Type	Condition	Plant
LE1	2	1	LSR1	E2C	1
LE2	4	1	LSR1	E2C	1
LE3	6	0	LSR1	E2C	1
LE4	6	0	LSR1	E2C	1
LE5	6	0	LSR1	E2C	1
LE6	6	0	LSR1	E2C	1
LE7	6	0	LSR1	E2C	1
LE8	6	0	LSR1	E2C	1
LE9	6	0	LSR1	E2C	1
LE10	6	0	LSR1	E2C	1
LE11	6	0	LSR1	E2C	1
LE12	6	0	LSR1	E2C	1
LE13	6	0	LSR1	E2C	1
LE14	6	0	LSR1	E2C	1
LE15	6	0	LSR1	E2C	1
LE16	6	0	LSR1	E2C	1
LE17	6	0	LSR1	E2C	1
LE18	6	0	LSR1	E2C	1
LE19	6	0	LSR1	E2C	1
LE20	6	0	LSR1	E2C	1
LE21	1	1	LSR1	E2C	2
LE22	1	1	LSR1	E2C	2
LE23	2	1	LSR1	E2C	2
LE24	5	1	LSR1	E2C	2
LE25	6	0	LSR1	E2C	2
LE26	6	0	LSR1	E2C	2
LE27	6	0	LSR1	E2C	2
LE28	6	0	LSR1	E2C	2
LE29	6	0	LSR1	E2C	2
LE30	6	0	LSR1	E2C	2
LE31	6	0	LSR1	E2C	2
LE32	6	0	LSR1	E2C	2
LE33	6	0	LSR1	E2C	2
LE34	6	0	LSR1	E2C	2
LE35	6	0	LSR1	E2C	2
LE36	6	0	LSR1	E2C	2
LE37	6	0	LSR1	E2C	2
LE38	6	0	LSR1	E2C	2
LE39	6	0	LSR1	E2C	2
LE40	6	0	LSR1	E2C	2
LE41	2	1	LSR1	E2C	3
LE42	6	0	LSR1	E2C	3
LE43	6	0	LSR1	E2C	3
LE44	6	0	LSR1	E2C	3
LE45	6	0	LSR1	E2C	3
LE46	6	0	LSR1	E2C	3
LE47	6	0	LSR1	E2C	3
LE48	6	0	LSR1	E2C	3
LE49	6	0	LSR1	E2C	3
LE50	6	0	LSR1	E2C	3
LE51	6	0	LSR1	E2C	3
LE52	6	0	LSR1	E2C	3
LE53	6	0	LSR1	E2C	3
LE54	6	0	LSR1	E2C	3
LE55	6	0	LSR1	E2C	3
LE56	6	0	LSR1	E2C	3
LE57	6	0	LSR1	E2C	3
LE58	6	0	LSR1	E2C	3
LE59	6	0	LSR1	E2C	3
LE60	6	0	LSR1	E2C	3
LC1	1	1	LSR1	C002	1
LC2	1	1	LSR1	C002	1
LC3	1	1	LSR1	C002	1
LC4	1	1	LSR1	C002	1
LC5	3	1	LSR1	C002	1
LC6	5	1	LSR1	C002	1
LC7	6	1	LSR1	C002	1
LC8	6	0	LSR1	C002	1
LC9	6	0	LSR1	C002	1
LC10	6	0	LSR1	C002	1
LC11	6	0	LSR1	C002	1
LC12	6	0	LSR1	C002	1
LC13	6	0	LSR1	C002	1
LC14	6	0	LSR1	C002	1
LC15	6	0	LSR1	C002	1
LC16	6	0	LSR1	C002	1
LC17	6	0	LSR1	C002	1
LC18	6	0	LSR1	C002	1
LC19	6	0	LSR1	C002	1
LC20	6	0	LSR1	C002	1
LC21	1	1	LSR1	C002	2
LC22	1	1	LSR1	C002	2
LC23	6	0	LSR1	C002	2
LC24	6	0	LSR1	C002	2
LC25	6	0	LSR1	C002	2
LC26	6	0	LSR1	C002	2
LC27	6	0	LSR1	C002	2
LC28	6	0	LSR1	C002	2
LC29	6	0	LSR1	C002	2
LC30	6	0	LSR1	C002	2
LC31	6	0	LSR1	C002	2
LC32	6	0	LSR1	C002	2
LC33	6	0	LSR1	C002	2
LC34	6	0	LSR1	C002	2
LC35	6	0	LSR1	C002	2
LC36	6	0	LSR1	C002	2
LC37	6	0	LSR1	C002	2
LC38	6	0	LSR1	C002	2
LC39	6	0	LSR1	C002	2
LC40	6	0	LSR1	C002	2
LC41	5	1	LSR1	C002	3
LC42	6	1	LSR1	C002	3
LC43	6	0	LSR1	C002	3
LC44	6	0	LSR1	C002	3
LC45	6	0	LSR1	C002	3
LC46	6	0	LSR1	C002	3
LC47	6	0	LSR1	C002	3
LC48	6	0	LSR1	C002	3
LC49	6	0	LSR1	C002	3
LC50	6	0	LSR1	C002	3
LC51	6	0	LSR1	C002	3
LC52	6	0	LSR1	C002	3
LC53	6	0	LSR1	C002	3
LC54	6	0	LSR1	C002	3
LC55	6	0	LSR1	C002	3
LC56	6	0	LSR1	C002	3
LC57	6	0	LSR1	C002	3
PE1	1	1	PA1	E2C	1
PE2	1	1	PA1	E2C	1
PE3	1	1	PA1	E2C	1
PE4	1	1	PA1	E2C	1
PE5	1	1	PA1	E2C	1
PE6	1	1	PA1	E2C	1
PE7	1	1	PA1	E2C	1
PE8	1	1	PA1	E2C	1
PE9	1	1	PA1	E2C	1
PE10	1	1	PA1	E2C	1
PE11	1	1	PA1	E2C	1
PE12	1	1	PA1	E2C	1
PE13	2	1	PA1	E2C	1
PE14	2	1	PA1	E2C	1
PE15	2	1	PA1	E2C	1
PE16	5	1	PA1	E2C	1
PE17	5	1	PA1	E2C	1
PE18	6	0	PA1	E2C	1
PE19	6	0	PA1	E2C	1
PE20	6	0	PA1	E2C	1
PE21	1	1	PA1	E2C	2
PE22	1	1	PA1	E2C	2
PE23	1	1	PA1	E2C	2
PE24	2	1	PA1	E2C	2
PE25	2	1	PA1	E2C	2
PE26	2	1	PA1	E2C	2
PE27	2	1	PA1	E2C	2
PE28	3	1	PA1	E2C	2
PE29	3	1	PA1	E2C	2
PE30	4	1	PA1	E2C	2
PE31	6	0	PA1	E2C	2
PE32	6	0	PA1	E2C	2
PE33	6	0	PA1	E2C	2
PE34	6	0	PA1	E2C	2
PE35	6	0	PA1	E2C	2
PE36	6	0	PA1	E2C	2
PE37	6	0	PA1	E2C	2
PE38	1	1	PA1	E2C	3
PE39	1	1	PA1	E2C	3
PE40	1	1	PA1	E2C	3
PE41	1	1	PA1	E2C	3
PE42	2	1	PA1	E2C	3
PE43	6	1	PA1	E2C	3
PE44	6	0	PA1	E2C	3
PE45	6	0	PA1	E2C	3
PE46	6	0	PA1	E2C	3
PE47	6	0	PA1	E2C	3
PE48	6	0	PA1	E2C	3
PE49	6	0	PA1	E2C	3
PE50	6	0	PA1	E2C	3
PE51	6	0	PA1	E2C	3
PE52	6	0	PA1	E2C	3
PE53	6	0	PA1	E2C	3
PE54	6	0	PA1	E2C	3
PE55	6	0	PA1	E2C	3
PE56	6	0	PA1	E2C	3
PC1	1	1	PA1	C002	1
PC2	1	1	PA1	C002	1
PC3	1	1	PA1	C002	1
PC4	1	1	PA1	C002	1
PC5	1	1	PA1	C002	1
PC6	1	1	PA1	C002	1
PC7	1	1	PA1	C002	1
PC8	1	1	PA1	C002	1
PC9	1	1	PA1	C002	1
PC10	1	1	PA1	C002	1
PC11	1	1	PA1	C002	1
PC12	2	1	PA1	C002	1
PC13	2	1	PA1	C002	1
PC14	3	1	PA1	C002	1
PC15	3	1	PA1	C002	1
PC16	6	0	PA1	C002	1
PC17	6	0	PA1	C002	1
PC18	6	0	PA1	C002	1
PC19	6	0	PA1	C002	1
PC20	6	0	PA1	C002	1
PC21	1	1	PA1	C002	2
PC22	1	1	PA1	C002	2
PC23	2	1	PA1	C002	2
PC24	3	1	PA1	C002	2
PC25	5	1	PA1	C002	2
PC26	5	1	PA1	C002	2
PC27	6	0	PA1	C002	2
PC28	6	0	PA1	C002	2
PC29	6	0	PA1	C002	2
PC30	6	0	PA1	C002	2
PC31	6	0	PA1	C002	2
PC32	6	0	PA1	C002	2
PC33	6	0	PA1	C002	2
PC34	6	0	PA1	C002	2
PC35	6	0	PA1	C002	2
PC36	6	0	PA1	C002	2
PC37	6	0	PA1	C002	2
PC38	6	0	PA1	C002	2
PC39	6	0	PA1	C002	2
PC40	6	0	PA1	C002	2
PC41	1	1	PA1	C002	3
PC42	1	1	PA1	C002	3
PC43	1	1	PA1	C002	3
PC44	1	1	PA1	C002	3
PC45	1	1	PA1	C002	3
PC46	1	1	PA1	C002	3
PC47	1	1	PA1	C002	3
PC48	1	1	PA1	C002	3
PC49	2	1	PA1	C002	3
PC50	4	1	PA1	C002	3
PC51	5	1	PA1	C002	3
PC52	6	0	PA1	C002	3
PC53	6	0	PA1	C002	3
PC54	6	0	PA1	C002	3
PC55	6	0	PA1	C002	3
PC56	6	0	PA1	C002	3
PC57	6	0	PA1	C002	3
PC58	6	0	PA1	C002	3
PC59	6	0	PA1	C002	3
TE1	6	0	Tucson	E2C	1
TE2	6	0	Tucson	E2C	1
TE3	6	0	Tucson	E2C	1
TE4	6	0	Tucson	E2C	1
TE5	6	0	Tucson	E2C	1
TE6	6	0	Tucson	E2C	1
TE7	6	0	Tucson	E2C	1
TE8	6	0	Tucson	E2C	1
TE9	6	0	Tucson	E2C	1
TE10	6	0	Tucson	E2C	1
TE11	6	0	Tucson	E2C	1
TE12	6	0	Tucson	E2C	1
TE13	6	0	Tucson	E2C	1
TE14	6	0	Tucson	E2C	1
TE15	6	0	Tucson	E2C	1
TE16	6	0	Tucson	E2C	1
TE17	6	0	Tucson	E2C	1
TE18	6	0	Tucson	E2C	1
TE19	6	0	Tucson	E2C	1
TE20	1	1	Tucson	E2C	2
TE21	1	1	Tucson	E2C	2
TE22	1	1	Tucson	E2C	2
TE23	1	1	Tucson	E2C	2
TE24	1	1	Tucson	E2C	2
TE25	2	1	Tucson	E2C	2
TE26	4	1	Tucson	E2C	2
TE27	5	1	Tucson	E2C	2
TE28	6	0	Tucson	E2C	2
TE29	6	0	Tucson	E2C	2
TE30	6	0	Tucson	E2C	2
TE31	6	0	Tucson	E2C	2
TE32	6	0	Tucson	E2C	2
TE33	6	0	Tucson	E2C	2
TE34	6	0	Tucson	E2C	2
TE35	6	0	Tucson	E2C	2
TE36	6	0	Tucson	E2C	2
TE37	6	0	Tucson	E2C	2
TE38	6	0	Tucson	E2C	2
TE39	6	0	Tucson	E2C	2
TE40	0	1	Tucson	E2C	3
TE41	6	0	Tucson	E2C	3
TE42	6	0	Tucson	E2C	3
TE43	6	0	Tucson	E2C	3
TE44	6	0	Tucson	E2C	3
TE45	6	0	Tucson	E2C	3
TE46	6	0	Tucson	E2C	3
TE47	6	0	Tucson	E2C	3
TE48	6	0	Tucson	E2C	3
TE49	6	0	Tucson	E2C	3
TE50	6	0	Tucson	E2C	3
TE51	6	0	Tucson	E2C	3
TE52	6	0	Tucson	E2C	3
TE53	6	0	Tucson	E2C	3
TE54	6	0	Tucson	E2C	3
TE55	6	0	Tucson	E2C	3
TE56	6	0	Tucson	E2C	3
TE57	6	0	Tucson	E2C	3
TE58	6	0	Tucson	E2C	3
TE59	6	0	Tucson	E2C	3
TC1	1	1	Tucson	C002	4
TC2	6	1	Tucson	C002	4
TC3	6	0	Tucson	C002	4
TC4	6	0	Tucson	C002	4
TC5	6	0	Tucson	C002	4
TC6	6	0	Tucson	C002	4
TC7	6	0	Tucson	C002	4
TC8	6	0	Tucson	C002	4
TC9	6	0	Tucson	C002	4
TC10	6	0	Tucson	C002	4
TC11	6	0	Tucson	C002	4
TC12	6	0	Tucson	C002	4
TC13	6	0	Tucson	C002	4
TC14	6	0	Tucson	C002	4
TC15	6	0	Tucson	C002	4
TC16	6	0	Tucson	C002	4
TC17	6	0	Tucson	C002	4
TC18	6	0	Tucson	C002	4
TC19	6	0	Tucson	C002	4
TC20	6	0	Tucson	C002	4
TC21	1	1	Tucson	C002	5
TC22	1	1	Tucson	C002	5
TC23	1	1	Tucson	C002	5
TC24	4	1	Tucson	C002	5
TC25	6	0	Tucson	C002	5
TC26	6	0	Tucson	C002	5
TC27	6	0	Tucson	C002	5
TC28	6	0	Tucson	C002	5
TC29	6	0	Tucson	C002	5
TC30	6	0	Tucson	C002	5
TC31	6	0	Tucson	C002	5
TC32	6	0	Tucson	C002	5
TC33	6	0	Tucson	C002	5
TC34	6	0	Tucson	C002	5
TC35	6	0	Tucson	C002	5
TC36	6	0	Tucson	C002	5
TC37	6	0	Tucson	C002	5
TC38	6	0	Tucson	C002	5
TC39	6	0	Tucson	C002	5
TC40	1	1	Tucson	C002	6
TC41	1	1	Tucson	C002	6
TC42	1	1	Tucson	C002	6
TC43	2	1	Tucson	C002	6
TC44	5	1	Tucson	C002	6
TC45	6	0	Tucson	C002	6
TC46	6	0	Tucson	C002	6
TC47	6	0	Tucson	C002	6
TC48	6	0	Tucson	C002	6
TC49	6	0	Tucson	C002	6
TC50	6	0	Tucson	C002	6
TC51	6	0	Tucson	C002	6
TC52	6	0	Tucson	C002	6
TC53	6	0	Tucson	C002	6
TC54	6	0	Tucson	C002	6
TC55	6	0	Tucson	C002	6
TC56	6	0	Tucson	C002	6
TC57	6	0	Tucson	C002	6
TC58	6	0	Tucson	C002	6
TC59	6	0	Tucson	C002	6
5E1	5	1	5A	E2C	7
5E2	6	0	5A	E2C	7
5E3	6	0	5A	E2C	7
5E4	6	0	5A	E2C	7
5E5	6	0	5A	E2C	7
5E6	6	0	5A	E2C	7
5E7	6	0	5A	E2C	7
5E8	6	0	5A	E2C	7
5E9	6	0	5A	E2C	7
5E10	6	0	5A	E2C	7
5E11	6	0	5A	E2C	7
5E12	6	0	5A	E2C	7
5E13	6	0	5A	E2C	7
5E14	6	0	5A	E2C	7
5E15	6	0	5A	E2C	7
5E16	6	0	5A	E2C	7
5E17	6	0	5A	E2C	7
5E18	6	0	5A	E2C	7
5E19	6	0	5A	E2C	7
5E20	6	0	5A	E2C	7
5E21	0	1	5A	E2C	8
5E22	1	1	5A	E2C	8
5E23	4	1	5A	E2C	8
5E24	6	1	5A	E2C	8
5E25	6	0	5A	E2C	8
5E26	6	0	5A	E2C	8
5E27	6	0	5A	E2C	8
5E28	6	0	5A	E2C	8
5E29	6	0	5A	E2C	8
5E30	6	0	5A	E2C	8
5E31	6	0	5A	E2C	8
5E32	6	0	5A	E2C	8
5E33	6	0	5A	E2C	8
5E34	6	0	5A	E2C	8
5E35	6	0	5A	E2C	8
5E36	6	0	5A	E2C	8
5E37	6	0	5A	E2C	8
5E38	6	0	5A	E2C	8
5E39	6	0	5A	E2C	8
5E40	6	0	5A	E2C	8
5E41	0	1	5A	E2C	9
5E42	1	1	5A	E2C	9
5E43	1	1	5A	E2C	9
5E44	1	1	5A	E2C	9
5E45	2	1	5A	E2C	9
5E46	3	1	5A	E2C	9
5E47	3	1	5A	E2C	9
5E48	4	1	5A	E2C	9
5E49	4	1	5A	E2C	9
5E50	5	1	5A	E2C	9
5E51	5	1	5A	E2C	9
5E52	6	1	5A	E2C	9
5E53	6	0	5A	E2C	9
5E54	6	0	5A	E2C	9
5E55	6	0	5A	E2C	9
5E56	6	0	5A	E2C	9
5E57	6	0	5A	E2C	9
5E58	6	0	5A	E2C	9
5E59	6	0	5A	E2C	9
5E60	6	0	5A	E2C	9
5C1	1	1	5A	C002	10
5C2	1	1	5A	C002	10
5C3	2	1	5A	C002	10
5C4	3	1	5A	C002	10
5C5	3	1	5A	C002	10
5C6	3	1	5A	C002	10
5C7	4	1	5A	C002	10
5C8	4	1	5A	C002	10
5C9	6	0	5A	C002	10
5C10	6	0	5A	C002	10
5C11	6	0	5A	C002	10
5C12	6	0	5A	C002	10
5C13	6	0	5A	C002	10
5C14	6	0	5A	C002	10
5C15	6	0	5A	C002	10
5C16	6	0	5A	C002	10
5C17	6	0	5A	C002	10
5C18	6	0	5A	C002	10
5C19	6	0	5A	C002	10
5C20	6	0	5A	C002	10
5C21	3	1	5A	C002	11
5C22	6	0	5A	C002	11
5C23	6	0	5A	C002	11
5C24	6	0	5A	C002	11
5C25	6	0	5A	C002	11
5C26	6	0	5A	C002	11
5C27	6	0	5A	C002	11
5C28	6	0	5A	C002	11
5C29	6	0	5A	C002	11
5C30	6	0	5A	C002	11
5C31	6	0	5A	C002	11
5C32	6	0	5A	C002	11
5C33	6	0	5A	C002	11
5C34	6	0	5A	C002	11
5C35	6	0	5A	C002	11
5C36	6	0	5A	C002	11
5C37	6	0	5A	C002	11
5C38	6	0	5A	C002	11
5C39	6	0	5A	C002	11
5C40	6	0	5A	C002	11
5C41	1	1	5A	C002	12
5C42	1	1	5A	C002	12
5C43	1	1	5A	C002	12
5C44	1	1	5A	C002	12
5C45	1	1	5A	C002	12
5C46	6	0	5A	C002	12
5C47	6	0	5A	C002	12
5C48	6	0	5A	C002	12
5C49	6	0	5A	C002	12
5C50	6	0	5A	C002	12
5C51	6	0	5A	C002	12
5C52	6	0	5A	C002	12
5C53	6	0	5A	C002	12
5C54	6	0	5A	C002	12
5C55	6	0	5A	C002	12
5C56	6	0	5A	C002	12
5C57	6	0	5A	C002	12
5C58	6	0	5A	C002	12
5C59	6	0	5A	C002	12

## Sheet: Figure_3B_Trial1
Aphid	Stop	Death	Type	Condition	Plant	Bacteria
LE1	6	1	LSR1	E2C	1	HT115
LE2	6	1	LSR1	E2C	1	HT115
LE3	7	1	LSR1	E2C	1	HT115
LE4	7	1	LSR1	E2C	1	HT115
LE5	7	0	LSR1	E2C	1	HT115
LE6	5	1	LSR1	E2C	2	HT115
LE7	5	1	LSR1	E2C	2	HT115
LE8	6	1	LSR1	E2C	2	HT115
LE9	7	1	LSR1	E2C	2	HT115
LE10	7	1	LSR1	E2C	2	HT115
LE11	5	1	LSR1	E2C	3	HT115
LE12	5	1	LSR1	E2C	3	HT115
LE13	5	1	LSR1	E2C	3	HT115
LE14	6	1	LSR1	E2C	3	HT115
LE15	6	1	LSR1	E2C	3	HT115
LE16	6	1	LSR1	E2C	3	HT115
LE17	6	1	LSR1	E2C	3	HT115
LE18	6	1	LSR1	E2C	3	HT115
LE19	6	1	LSR1	E2C	3	HT115
LE20	7	1	LSR1	E2C	3	HT115
LE21	7	0	LSR1	E2C	3	HT115
LE22	7	0	LSR1	E2C	3	HT115
LC1	1	1	LSR1	C002	1	HT115
LC2	4	1	LSR1	C002	1	HT115
LC3	5	1	LSR1	C002	1	HT115
LC4	5	1	LSR1	C002	1	HT115
LC5	5	1	LSR1	C002	1	HT115
LC6	5	1	LSR1	C002	1	HT115
LC7	5	1	LSR1	C002	1	HT115
LC8	5	1	LSR1	C002	1	HT115
LC9	7	1	LSR1	C002	1	HT115
LC10	4	1	LSR1	C002	2	HT115
LC11	6	1	LSR1	C002	2	HT115
LC12	6	1	LSR1	C002	2	HT115
LC13	4	1	LSR1	C002	3	HT115
LC14	4	1	LSR1	C002	3	HT115
LC15	5	1	LSR1	C002	3	HT115
LC16	6	1	LSR1	C002	3	HT115
LC17	7	1	LSR1	C002	3	HT115

## Sheet: Figure_3B_Trial2
Aphid	Stop	Death	Type	Condition	Plant	Bacteria
LE1	5	1	LSR1	E2C	1	HT115
LE2	7	1	LSR1	E2C	1	HT115
LE3	7	1	LSR1	E2C	1	HT115
LE4	5	1	LSR1	E2C	2	HT115
LE5	5	1	LSR1	E2C	2	HT115
LE6	6	1	LSR1	E2C	2	HT115
LE7	6	1	LSR1	E2C	2	HT115
LE8	7	1	LSR1	E2C	2	HT115
LE9	7	1	LSR1	E2C	2	HT115
LE10	7	1	LSR1	E2C	2	HT115
LE11	7	1	LSR1	E2C	2	HT115
LE12	7	0	LSR1	E2C	2	HT115
LE13	4	1	LSR1	E2C	3	HT115
LE14	5	1	LSR1	E2C	3	HT115
LE15	5	1	LSR1	E2C	3	HT115
LE16	5	1	LSR1	E2C	3	HT115
LE17	5	1	LSR1	E2C	3	HT115
LE18	5	1	LSR1	E2C	3	HT115
LE19	5	1	LSR1	E2C	3	HT115
LE20	6	1	LSR1	E2C	3	HT115
LE21	6	1	LSR1	E2C	3	HT115
LE22	6	1	LSR1	E2C	3	HT115
LE23	6	1	LSR1	E2C	3	HT115
LE24	6	1	LSR1	E2C	3	HT115
LE25	6	1	LSR1	E2C	3	HT115
LE26	6	1	LSR1	E2C	3	HT115
LE27	7	1	LSR1	E2C	3	HT115
LE28	7	1	LSR1	E2C	3	HT115
LE29	7	0	LSR1	E2C	3	HT115
LE30	4	1	LSR1	E2C	4	HT115
LE31	4	1	LSR1	E2C	4	HT115
LE32	5	1	LSR1	E2C	4	HT115
LE33	5	1	LSR1	E2C	4	HT115
LE34	5	1	LSR1	E2C	4	HT115
LE35	5	1	LSR1	E2C	4	HT115
LE36	6	1	LSR1	E2C	4	HT115
LE37	6	1	LSR1	E2C	4	HT115
LE38	6	1	LSR1	E2C	4	HT115
LE39	7	1	LSR1	E2C	4	HT115
LE40	5	1	LSR1	E2C	5	HT115
LE41	5	1	LSR1	E2C	5	HT115
LE42	5	1	LSR1	E2C	5	HT115
LE43	6	1	LSR1	E2C	5	HT115
LE44	6	1	LSR1	E2C	5	HT115
LE45	6	1	LSR1	E2C	5	HT115
LE46	6	1	LSR1	E2C	5	HT115
LE47	6	1	LSR1	E2C	5	HT115
LE48	6	1	LSR1	E2C	5	HT115
LE49	6	1	LSR1	E2C	5	HT115
LE50	4	1	LSR1	E2C	6	HT115
LE51	5	1	LSR1	E2C	6	HT115
LE52	6	1	LSR1	E2C	6	HT115
LE53	6	1	LSR1	E2C	6	HT115
LE54	7	0	LSR1	E2C	6	HT115
LC1	5	1	LSR1	C002	1	HT115
LC2	5	1	LSR1	C002	1	HT115
LC3	6	1	LSR1	C002	1	HT115
LC4	6	1	LSR1	C002	1	HT115
LC5	6	1	LSR1	C002	1	HT115
LC6	6	1	LSR1	C002	1	HT115
LC7	7	1	LSR1	C002	1	HT115
LC8	7	1	LSR1	C002	1	HT115
LC9	1	1	LSR1	C002	2	HT115
LC10	5	1	LSR1	C002	2	HT115
LC11	6	1	LSR1	C002	2	HT115
LC12	5	1	LSR1	C002	3	HT115
LC13	5	1	LSR1	C002	3	HT115
LC14	5	1	LSR1	C002	3	HT115
LC15	5	1	LSR1	C002	3	HT115
LC16	5	1	LSR1	C002	3	HT115
LC17	6	1	LSR1	C002	3	HT115
LC18	6	1	LSR1	C002	3	HT115
LC19	6	1	LSR1	C002	3	HT115
LC20	6	1	LSR1	C002	3	HT115
LC21	6	1	LSR1	C002	3	HT115
LC22	7	1	LSR1	C002	3	HT115
LC23	7	1	LSR1	C002	3	HT115
LC24	7	1	LSR1	C002	3	HT115
LC25	7	1	LSR1	C002	3	HT115
LC26	5	1	LSR1	C002	4	HT115
LC27	5	1	LSR1	C002	4	HT115
LC28	6	1	LSR1	C002	4	HT115
LC29	7	1	LSR1	C002	4	HT115
LC30	3	1	LSR1	C002	5	HT115
LC31	4	1	LSR1	C002	5	HT115
LC32	5	1	LSR1	C002	5	HT115
LC33	5	1	LSR1	C002	5	HT115
LC34	5	1	LSR1	C002	5	HT115
LC35	5	1	LSR1	C002	5	HT115
LC36	5	1	LSR1	C002	5	HT115
LC37	6	1	LSR1	C002	5	HT115
LC38	6	1	LSR1	C002	5	HT115
LC39	6	1	LSR1	C002	5	HT115
LC40	6	1	LSR1	C002	5	HT115
LC41	6	1	LSR1	C002	5	HT115
LC42	6	1	LSR1	C002	5	HT115
LC43	7	1	LSR1	C002	5	HT115
LC44	7	1	LSR1	C002	5	HT115
LC45	4	1	LSR1	C002	6	HT115
LC46	5	1	LSR1	C002	6	HT115
LC47	5	1	LSR1	C002	6	HT115
LC48	5	1	LSR1	C002	6	HT115
LC49	5	1	LSR1	C002	6	HT115
LC50	6	1	LSR1	C002	6	HT115
LC51	6	1	LSR1	C002	6	HT115
LC52	6	1	LSR1	C002	6	HT115
LC53	6	1	LSR1	C002	6	HT115
LC54	6	1	LSR1	C002	6	HT115
LC55	6	1	LSR1	C002	6	HT115
LC56	6	1	LSR1	C002	6	HT115
LC57	7	1	LSR1	C002	6	HT115
LC58	7	1	LSR1	C002	6	HT115
LC59	7	1	LSR1	C002	6	HT115

## Sheet: Figure_3C
Aphid	Stop	Death	Type	Condition	Plant	Bacteria
5E1	5	1	5A	E2C	1	HT115
5E2	5	1	5A	E2C	1	HT115
5E3	5	1	5A	E2C	1	HT115
5E4	6	1	5A	E2C	1	HT115
5E5	6	1	5A	E2C	1	HT115
5E6	6	1	5A	E2C	1	HT115
5E7	6	1	5A	E2C	1	HT115
5E8	6	1	5A	E2C	1	HT115
5E9	6	1	5A	E2C	1	HT115
5E10	7	0	5A	E2C	1	HT115
5E11	7	0	5A	E2C	1	HT115
5E12	5	1	5A	E2C	2	HT115
5E13	5	1	5A	E2C	2	HT115
5E14	5	1	5A	E2C	2	HT115
5E15	5	1	5A	E2C	2	HT115
5E16	5	1	5A	E2C	2	HT115
5E17	5	1	5A	E2C	2	HT115
5E18	6	1	5A	E2C	2	HT115
5E19	6	1	5A	E2C	2	HT115
5E20	6	1	5A	E2C	2	HT115
5E21	6	1	5A	E2C	2	HT115
5E22	6	1	5A	E2C	2	HT115
5E23	6	1	5A	E2C	2	HT115
5E24	6	1	5A	E2C	2	HT115
5E25	7	1	5A	E2C	2	HT115
5E26	7	0	5A	E2C	2	HT115
5E27	4	1	5A	E2C	3	HT115
5E28	4	1	5A	E2C	3	HT115
5E29	5	1	5A	E2C	3	HT115
5E30	5	1	5A	E2C	3	HT115
5E31	6	1	5A	E2C	3	HT115
5E32	6	1	5A	E2C	3	HT115
5E33	7	1	5A	E2C	3	HT115
5E34	7	1	5A	E2C	3	HT115
5E35	7	1	5A	E2C	3	HT115
5E36	7	1	5A	E2C	3	HT115
5E37	7	1	5A	E2C	3	HT115
5E38	7	0	5A	E2C	3	HT115
5C1	5	1	5A	C002	1	HT115
5C2	5	1	5A	C002	1	HT115
5C3	5	1	5A	C002	1	HT115
5C4	5	1	5A	C002	1	HT115
5C5	5	1	5A	C002	1	HT115
5C6	5	1	5A	C002	1	HT115
5C7	6	1	5A	C002	1	HT115
5C8	6	1	5A	C002	1	HT115
5C9	6	1	5A	C002	1	HT115
5C10	6	1	5A	C002	1	HT115
5C11	6	1	5A	C002	1	HT115
5C12	3	1	5A	C002	2	HT115
5C13	4	1	5A	C002	2	HT115
5C14	5	1	5A	C002	2	HT115
5C15	5	1	5A	C002	2	HT115
5C16	5	1	5A	C002	2	HT115
5C17	5	1	5A	C002	2	HT115
5C18	5	1	5A	C002	2	HT115
5C19	6	1	5A	C002	2	HT115
5C20	6	1	5A	C002	2	HT115
5C21	6	1	5A	C002	2	HT115
5C22	6	1	5A	C002	2	HT115
5C23	7	1	5A	C002	2	HT115
5C24	7	1	5A	C002	2	HT115
5C25	7	0	5A	C002	2	HT115
5C26	3	1	5A	C002	3	HT115
5C27	4	1	5A	C002	3	HT115
5C28	4	1	5A	C002	3	HT115
5C29	5	1	5A	C002	3	HT115
5C30	5	1	5A	C002	3	HT115
5C31	6	1	5A	C002	3	HT115
5C32	6	1	5A	C002	3	HT115
5C33	6	1	5A	C002	3	HT115
5C34	6	1	5A	C002	3	HT115
5C35	7	1	5A	C002	3	HT115
5C36	7	1	5A	C002	3	HT115
5C37	7	1	5A	C002	3	HT115
5C38	7	0	5A	C002	3	HT115

## Sheet: Figure_3D
Aphid	Stop	Death	Condition	Plant	Bacteria
E1	4	1	E2C	1	Ss
E2	4	1	E2C	1	Ss
E3	6	1	E2C	1	Ss
E4	6	1	E2C	1	Ss
E5	7	1	E2C	1	Ss
E6	7	1	E2C	1	Ss
E7	7	1	E2C	1	Ss
E8	7	1	E2C	1	Ss
E9	7	1	E2C	1	Ss
E10	7	1	E2C	1	Ss
E11	7	1	E2C	1	Ss
E12	7	1	E2C	1	Ss
E13	7	1	E2C	1	Ss
E14	8	1	E2C	1	Ss
E15	8	1	E2C	1	Ss
E16	8	1	E2C	1	Ss
E17	8	0	E2C	1	Ss
E18	8	0	E2C	1	Ss
E19	8	0	E2C	1	Ss
E20	8	0	E2C	1	Ss
E21	7	1	E2C	2	Ss
E22	7	1	E2C	2	Ss
E23	7	1	E2C	2	Ss
E24	7	1	E2C	2	Ss
E25	8	1	E2C	2	Ss
E26	8	1	E2C	2	Ss
E27	8	1	E2C	2	Ss
E28	8	1	E2C	2	Ss
E29	8	1	E2C	2	Ss
E30	8	1	E2C	2	Ss
E31	8	0	E2C	2	Ss
E32	8	0	E2C	2	Ss
E33	8	0	E2C	2	Ss
E34	6	1	E2C	3	Ss
E35	6	1	E2C	3	Ss
E36	6	1	E2C	3	Ss
E37	6	1	E2C	3	Ss
E38	7	1	E2C	3	Ss
E39	7	1	E2C	3	Ss
E40	7	1	E2C	3	Ss
E41	7	1	E2C	3	Ss
E42	7	1	E2C	3	Ss
E43	7	1	E2C	3	Ss
E44	7	1	E2C	3	Ss
E45	7	1	E2C	3	Ss
E46	7	1	E2C	3	Ss
E47	8	1	E2C	3	Ss
E48	8	1	E2C	3	Ss
E49	8	1	E2C	3	Ss
E50	8	0	E2C	3	Ss
E51	8	0	E2C	3	Ss
E52	8	0	E2C	3	Ss
E53	8	0	E2C	3	Ss
E54	8	0	E2C	3	Ss
E55	8	0	E2C	3	Ss
C1	6	1	C002	1	Ss
C2	7	1	C002	1	Ss
C3	8	1	C002	1	Ss
C4	8	1	C002	1	Ss
C5	8	1	C002	1	Ss
C6	8	1	C002	1	Ss
C7	8	0	C002	1	Ss
C8	8	0	C002	1	Ss
C9	8	0	C002	1	Ss
C10	8	0	C002	1	Ss
C11	8	0	C002	1	Ss
C12	8	0	C002	1	Ss
C13	8	0	C002	1	Ss
C14	8	0	C002	1	Ss
C15	8	0	C002	1	Ss
C16	5	1	C002	2	Ss
C17	6	1	C002	2	Ss
C18	7	1	C002	2	Ss
C19	8	1	C002	2	Ss
C20	8	1	C002	2	Ss
C21	8	1	C002	2	Ss
C22	8	0	C002	2	Ss
C23	8	0	C002	2	Ss
C24	8	0	C002	2	Ss
C25	8	0	C002	2	Ss
C26	8	0	C002	2	Ss
C27	6	1	C002	3	Ss
C28	6	1	C002	3	Ss
C29	7	1	C002	3	Ss
C30	8	1	C002	3	Ss
C31	8	0	C002	3	Ss
C32	8	0	C002	3	Ss
C33	8	0	C002	3	Ss
C34	8	0	C002	3	Ss

## Sheet: Figure_4A
Aphid	Stop	Death	Condition	Plant	Bacteria
EN1	4	1	E2CNuc	1	HT115
EN2	5	1	E2CNuc	1	HT115
EN3	5	1	E2CNuc	1	HT115
EN4	5	1	E2CNuc	1	HT115
EN5	6	1	E2CNuc	1	HT115
EN6	6	1	E2CNuc	1	HT115
EN7	6	1	E2CNuc	1	HT115
EN8	6	1	E2CNuc	1	HT115
EN9	6	1	E2CNuc	1	HT115
EN10	6	1	E2CNuc	1	HT115
EN11	6	1	E2CNuc	1	HT115
EN12	7	1	E2CNuc	1	HT115
EN13	7	1	E2CNuc	1	HT115
EN14	4	1	E2CNuc	2	HT115
EN15	4	1	E2CNuc	2	HT115
EN16	4	1	E2CNuc	2	HT115
EN17	5	1	E2CNuc	2	HT115
EN18	5	1	E2CNuc	2	HT115
EN19	5	1	E2CNuc	2	HT115
EN20	5	1	E2CNuc	2	HT115
EN21	5	1	E2CNuc	2	HT115
EN22	5	1	E2CNuc	2	HT115
EN23	5	1	E2CNuc	2	HT115
EN24	5	1	E2CNuc	2	HT115
EN25	5	1	E2CNuc	2	HT115
EN26	5	1	E2CNuc	3	HT115
EN27	5	1	E2CNuc	3	HT115
EN28	5	1	E2CNuc	3	HT115
EN29	5	1	E2CNuc	3	HT115
EN30	5	1	E2CNuc	3	HT115
EN31	6	1	E2CNuc	3	HT115
EN32	6	1	E2CNuc	3	HT115
EN33	6	1	E2CNuc	3	HT115
EN34	7	1	E2CNuc	3	HT115
EN35	7	1	E2CNuc	3	HT115
EN36	7	1	E2CNuc	3	HT115
EN37	7	1	E2CNuc	3	HT115
EN38	7	1	E2CNuc	3	HT115
EN39	7	0	E2CNuc	3	HT115
EN40	4	1	E2CNuc	4	HT115
EN41	4	1	E2CNuc	4	HT115
EN42	4	1	E2CNuc	4	HT115
EN43	4	1	E2CNuc	4	HT115
EN44	4	1	E2CNuc	4	HT115
EN45	5	1	E2CNuc	4	HT115
EN46	5	1	E2CNuc	4	HT115
EN47	5	1	E2CNuc	4	HT115
EN48	5	1	E2CNuc	4	HT115
EN49	5	1	E2CNuc	4	HT115
EN50	5	1	E2CNuc	4	HT115
EN51	5	1	E2CNuc	4	HT115
EN52	6	1	E2CNuc	4	HT115
EN53	6	1	E2CNuc	4	HT115
EN54	6	1	E2CNuc	4	HT115
EN55	7	1	E2CNuc	4	HT115
EN56	7	1	E2CNuc	4	HT115
EN57	3	1	E2CNuc	5	HT115
EN58	5	1	E2CNuc	5	HT115
EN59	5	1	E2CNuc	5	HT115
EN60	5	1	E2CNuc	5	HT115
EN61	5	1	E2CNuc	5	HT115
EN62	5	1	E2CNuc	5	HT115
EN63	5	1	E2CNuc	5	HT115
EN64	5	1	E2CNuc	5	HT115
EN65	6	1	E2CNuc	5	HT115
EN66	6	1	E2CNuc	5	HT115
EN67	6	1	E2CNuc	5	HT115
EN68	6	1	E2CNuc	5	HT115
EN69	6	1	E2CNuc	5	HT115
EN70	6	1	E2CNuc	5	HT115
EN71	7	1	E2CNuc	5	HT115
CN1	5	1	C002Nuc	1	HT115
CN2	5	1	C002Nuc	1	HT115
CN3	5	1	C002Nuc	1	HT115
CN4	5	1	C002Nuc	1	HT115
CN5	6	1	C002Nuc	1	HT115
CN6	6	1	C002Nuc	1	HT115
CN7	6	1	C002Nuc	1	HT115
CN8	6	1	C002Nuc	1	HT115
CN9	7	1	C002Nuc	1	HT115
CN10	4	1	C002Nuc	2	HT115
CN11	5	1	C002Nuc	2	HT115
CN12	5	1	C002Nuc	2	HT115
CN13	5	1	C002Nuc	2	HT115
CN14	5	1	C002Nuc	2	HT115
CN15	5	1	C002Nuc	2	HT115
CN16	5	1	C002Nuc	2	HT115
CN17	4	1	C002Nuc	3	HT115
CN18	5	1	C002Nuc	3	HT115
CN19	5	1	C002Nuc	3	HT115
CN20	5	1	C002Nuc	3	HT115
CN21	6	1	C002Nuc	3	HT115
CN22	6	1	C002Nuc	3	HT115
CN23	7	1	C002Nuc	3	HT115
CN24	7	1	C002Nuc	3	HT115
CN25	4	1	C002Nuc	4	HT115
CN26	4	1	C002Nuc	4	HT115
CN27	4	1	C002Nuc	4	HT115
CN28	4	1	C002Nuc	4	HT115
CN29	4	1	C002Nuc	4	HT115
CN30	4	1	C002Nuc	4	HT115
CN31	5	1	C002Nuc	4	HT115
CN32	5	1	C002Nuc	4	HT115
CN33	5	1	C002Nuc	4	HT115
CN34	5	1	C002Nuc	4	HT115
CN35	7	1	C002Nuc	4	HT115
CN36	4	1	C002Nuc	5	HT115
CN37	4	1	C002Nuc	5	HT115
CN38	5	1	C002Nuc	5	HT115
CN39	5	1	C002Nuc	5	HT115
CN40	5	1	C002Nuc	5	HT115
CN41	5	1	C002Nuc	5	HT115
CN42	6	1	C002Nuc	5	HT115
CN43	6	1	C002Nuc	5	HT115
CN44	6	1	C002Nuc	5	HT115
CN45	7	1	C002Nuc	5	HT115
CN46	7	1	C002Nuc	5	HT115
CN47	7	0	C002Nuc	5	HT115
CN48	7	0	C002Nuc	5	HT115
CN49	7	0	C002Nuc	5	HT115

## Sheet: Figure_4B_Trial1
Aphid	Stop	Death	Condition	Plant	Bacteria
EN1	6	1	E2CNuc	1	Ss
EN2	7	1	E2CNuc	1	Ss
EN3	7	1	E2CNuc	1	Ss
EN4	7	1	E2CNuc	1	Ss
EN5	7	1	E2CNuc	1	Ss
EN6	8	1	E2CNuc	1	Ss
EN7	8	1	E2CNuc	1	Ss
EN8	8	1	E2CNuc	1	Ss
EN9	8	1	E2CNuc	1	Ss
EN10	8	0	E2CNuc	1	Ss
EN11	8	0	E2CNuc	1	Ss
EN12	8	0	E2CNuc	1	Ss
EN13	8	0	E2CNuc	1	Ss
EN14	8	0	E2CNuc	1	Ss
EN15	8	0	E2CNuc	1	Ss
EN16	8	0	E2CNuc	1	Ss
EN17	8	0	E2CNuc	1	Ss
EN18	8	0	E2CNuc	1	Ss
EN19	8	0	E2CNuc	1	Ss
EN20	6	1	E2CNuc	2	Ss
EN21	6	1	E2CNuc	2	Ss
EN22	6	1	E2CNuc	2	Ss
EN23	6	1	E2CNuc	2	Ss
EN24	6	1	E2CNuc	2	Ss
EN25	7	1	E2CNuc	2	Ss
EN26	7	1	E2CNuc	2	Ss
EN27	7	1	E2CNuc	2	Ss
EN28	8	1	E2CNuc	2	Ss
EN29	8	0	E2CNuc	2	Ss
EN30	8	0	E2CNuc	2	Ss
EN31	8	0	E2CNuc	2	Ss
EN32	8	0	E2CNuc	2	Ss
EN33	8	0	E2CNuc	2	Ss
EN34	8	0	E2CNuc	2	Ss
EN35	8	0	E2CNuc	2	Ss
EN36	8	0	E2CNuc	2	Ss
EN37	8	0	E2CNuc	2	Ss
EN38	7	1	E2CNuc	3	Ss
EN39	7	1	E2CNuc	3	Ss
EN40	7	1	E2CNuc	3	Ss
EN41	7	1	E2CNuc	3	Ss
EN42	8	1	E2CNuc	3	Ss
EN43	8	1	E2CNuc	3	Ss
EN44	8	0	E2CNuc	3	Ss
EN45	8	0	E2CNuc	3	Ss
EN46	8	0	E2CNuc	3	Ss
EN47	8	0	E2CNuc	3	Ss
EN48	8	0	E2CNuc	3	Ss
EN49	8	0	E2CNuc	3	Ss
EN50	8	0	E2CNuc	3	Ss
EN51	8	0	E2CNuc	3	Ss
EN52	8	0	E2CNuc	3	Ss
EN53	8	0	E2CNuc	3	Ss
EN54	8	0	E2CNuc	3	Ss
EN55	8	0	E2CNuc	3	Ss
EN56	8	0	E2CNuc	3	Ss
EN57	8	0	E2CNuc	3	Ss
CN1	4	1	C002Nuc	1	Ss
CN2	5	1	C002Nuc	1	Ss
CN3	5	1	C002Nuc	1	Ss
CN4	5	1	C002Nuc	1	Ss
CN5	6	1	C002Nuc	1	Ss
CN6	6	1	C002Nuc	1	Ss
CN7	6	1	C002Nuc	1	Ss
CN8	6	1	C002Nuc	1	Ss
CN9	7	1	C002Nuc	1	Ss
CN10	8	1	C002Nuc	1	Ss
CN11	8	1	C002Nuc	1	Ss
CN12	8	1	C002Nuc	1	Ss
CN13	8	1	C002Nuc	1	Ss
CN14	2	1	C002Nuc	2	Ss
CN15	6	1	C002Nuc	2	Ss
CN16	7	1	C002Nuc	2	Ss
CN17	7	1	C002Nuc	2	Ss
CN18	7	1	C002Nuc	2	Ss
CN19	7	1	C002Nuc	2	Ss
CN20	8	1	C002Nuc	2	Ss
CN21	8	1	C002Nuc	2	Ss
CN22	8	1	C002Nuc	2	Ss
CN23	8	1	C002Nuc	2	Ss
CN24	8	0	C002Nuc	2	Ss
CN25	8	0	C002Nuc	2	Ss
CN26	8	0	C002Nuc	2	Ss
CN27	8	0	C002Nuc	2	Ss
CN28	8	0	C002Nuc	2	Ss
CN29	5	1	C002Nuc	3	Ss
CN30	5	1	C002Nuc	3	Ss
CN31	5	1	C002Nuc	3	Ss
CN32	5	1	C002Nuc	3	Ss
CN33	5	1	C002Nuc	3	Ss
CN34	6	1	C002Nuc	3	Ss
CN35	6	1	C002Nuc	3	Ss
CN36	7	1	C002Nuc	3	Ss
CN37	8	1	C002Nuc	3	Ss
CN38	8	0	C002Nuc	3	Ss
CN39	8	0	C002Nuc	3	Ss

## Sheet: Figure_4B_Trial2
Aphid	Stop	Death	Condition	Plant	Bacteria
EN1	1	1	E2CNuc	1	Ss
EN2	3	1	E2CNuc	1	Ss
EN3	4	1	E2CNuc	1	Ss
EN4	6	1	E2CNuc	1	Ss
EN5	6	1	E2CNuc	1	Ss
EN6	7	1	E2CNuc	1	Ss
EN7	7	1	E2CNuc	1	Ss
EN8	7	1	E2CNuc	1	Ss
EN9	8	1	E2CNuc	1	Ss
EN10	8	1	E2CNuc	1	Ss
EN11	8	1	E2CNuc	1	Ss
EN12	8	1	E2CNuc	1	Ss
EN13	8	0	E2CNuc	1	Ss
EN14	8	0	E2CNuc	1	Ss
EN15	8	0	E2CNuc	1	Ss
EN16	6	1	E2CNuc	2	Ss
EN17	7	1	E2CNuc	2	Ss
EN18	7	1	E2CNuc	2	Ss
EN19	7	1	E2CNuc	2	Ss
EN20	8	1	E2CNuc	2	Ss
EN21	8	0	E2CNuc	2	Ss
EN22	7	1	E2CNuc	3	Ss
EN23	7	1	E2CNuc	3	Ss
EN24	8	1	E2CNuc	3	Ss
EN25	8	1	E2CNuc	3	Ss
EN26	8	1	E2CNuc	3	Ss
EN27	8	0	E2CNuc	3	Ss
EN28	8	0	E2CNuc	3	Ss
EN29	8	0	E2CNuc	3	Ss
EN30	8	0	E2CNuc	3	Ss
EN31	8	0	E2CNuc	3	Ss
EN32	3	1	E2CNuc	4	Ss
EN33	7	1	E2CNuc	4	Ss
EN34	7	1	E2CNuc	4	Ss
EN35	8	1	E2CNuc	4	Ss
EN36	8	1	E2CNuc	4	Ss
EN37	8	0	E2CNuc	4	Ss
EN38	8	0	E2CNuc	4	Ss
EN39	8	0	E2CNuc	4	Ss
EN40	8	0	E2CNuc	4	Ss
EN41	8	0	E2CNuc	4	Ss
EN42	8	0	E2CNuc	4	Ss
EN43	8	0	E2CNuc	4	Ss
EN44	8	0	E2CNuc	4	Ss
EN45	8	1	E2CNuc	5	Ss
EN46	8	0	E2CNuc	5	Ss
EN47	8	0	E2CNuc	5	Ss
EN48	8	0	E2CNuc	5	Ss
EN49	8	0	E2CNuc	5	Ss
EN50	8	0	E2CNuc	5	Ss
EN51	8	0	E2CNuc	5	Ss
EN52	8	0	E2CNuc	5	Ss
EN53	8	0	E2CNuc	5	Ss
EN54	8	0	E2CNuc	5	Ss
EN55	8	0	E2CNuc	5	Ss
CN1	6	1	C002Nuc	1	Ss
CN2	6	1	C002Nuc	1	Ss
CN3	8	1	C002Nuc	1	Ss
CN4	8	0	C002Nuc	1	Ss
CN5	8	0	C002Nuc	1	Ss
CN6	8	0	C002Nuc	1	Ss
CN7	8	0	C002Nuc	1	Ss
CN8	8	0	C002Nuc	1	Ss
CN9	8	0	C002Nuc	1	Ss
CN10	7	1	C002Nuc	2	Ss
CN11	8	1	C002Nuc	2	Ss
CN12	8	0	C002Nuc	2	Ss
CN13	8	0	C002Nuc	2	Ss
CN14	8	0	C002Nuc	2	Ss
CN15	8	0	C002Nuc	2	Ss
CN16	8	0	C002Nuc	2	Ss
CN17	8	0	C002Nuc	2	Ss
CN18	8	0	C002Nuc	2	Ss
CN19	7	1	C002Nuc	3	Ss
CN20	8	0	C002Nuc	3	Ss
CN21	8	0	C002Nuc	3	Ss
CN22	8	0	C002Nuc	3	Ss
CN23	8	0	C002Nuc	4	Ss
CN24	8	0	C002Nuc	4	Ss
CN25	8	0	C002Nuc	4	Ss
CN26	8	0	C002Nuc	4	Ss
CN27	8	0	C002Nuc	4	Ss
CN28	8	0	C002Nuc	4	Ss
CN29	8	0	C002Nuc	4	Ss
CN30	6	1	C002Nuc	5	Ss
CN31	7	1	C002Nuc	5	Ss
CN32	7	1	C002Nuc	5	Ss
CN33	8	0	C002Nuc	5	Ss
CN34	8	0	C002Nuc	5	Ss
CN35	8	0	C002Nuc	5	Ss

## Sheet: Figure_5A
Condition	Day	Plant	Wing	Nonwing	Total	Percent
EcR	0	Initial-EcR-Plate-1	17	29	46	36.9565
EcR	0	Initial-EcR-Plate-2	10	25	35	28.5714
EcR	0	Initial-EcR-Plate-3	15	12	27	55.5556
EcR	0	Initial-EcR-Plate-4	17	30	47	36.1702
EcR	0	Initial-EcR-Plate-5	10	54	64	15.625
EcR	0	Initial-EcR-Plate-6	26	28	54	48.1481
NC	0	Initial-NC-Plate-1	16	32	48	33.3333
NC	0	Initial-NC-Plate-2	2	57	59	3.38983
NC	0	Initial-NC-Plate-3	4	48	52	7.69231
NC	0	Initial-NC-Plate-4	10	31	41	24.3902
NC	0	Initial-NC-Plate-5	2	24	26	7.69231
NC	0	Initial-NC-Plate-6	33	12	45	73.3333
EcR	1	Final-EcR-Plant-1	16	21	37	43.2432
EcR	1	Final-EcR-Plant-2	30	8	38	78.9474
EcR	1	Final-EcR-Plant-3	23	14	37	62.1622
EcR	1	Final-EcR-Plant-4	19	17	36	52.7778
EcR	1	Final-EcR-Plant-5	20	21	41	48.7805
EcR	1	Final-EcR-Plant-6	6	18	24	25
EcR	1	Final-EcR-Plant-8	21	24	45	46.6667
EcR	1	Final-EcR-Plant-9	31	18	49	63.2653
NC	1	Final-NC-Plant-1	9	24	33	27.2727
NC	1	Final-NC-Plant-2	24	17	41	58.5366
NC	1	Final-NC-Plant-3	23	12	35	65.7143
NC	1	Final-NC-Plant-4	16	15	31	51.6129
NC	1	Final-NC-Plant-5	31	17	48	64.5833
NC	1	Final-NC-Plant-6	17	34	51	33.3333
NC	1	Final-NC-Plant-7	2	45	47	4.25532
NC	1	Final-NC-Plant-8	17	30	47	36.1702
NC	1	Final-NC-Plant-9	37	2	39	94.8718
EcR	2	Final-EcR-Plant-1	38	9	47	80.8511
EcR	2	Final-EcR-Plant-2	44	0	44	100
EcR	2	Final-EcR-Plant-3	30	13	43	69.7674
EcR	2	Final-EcR-Plant-4	32	9	41	78.0488
EcR	2	Final-EcR-Plant-5	44	4	48	91.6667
EcR	2	Final-EcR-Plant-6	10	30	40	25
EcR	2	Final-EcR-Plant-7	11	15	26	42.3077
EcR	2	Final-EcR-Plant-8	25	18	43	58.1395
EcR	2	Final-EcR-Plant-9	41	7	48	85.4167
NC	2	Final-NC-Plant-1	4	21	25	16
NC	2	Final-NC-Plant-2	14	17	31	45.1613
NC	2	Final-NC-Plant-3	18	21	39	46.1538
NC	2	Final-NC-Plant-4	40	15	55	72.7273
NC	2	Final-NC-Plant-5	35	6	41	85.3659
NC	2	Final-NC-Plant-6	22	23	45	48.8889
NC	2	Final-NC-Plant-7	13	20	33	39.3939
NC	2	Final-NC-Plant-8	35	9	44	79.5455
NC	2	Final-NC-Plant-9	51	2	53	96.2264
EcR	3	Final-EcR-Plant-1	51	14	65	78.4615
EcR	3	Final-EcR-Plant-2	38	5	43	88.3721
EcR	3	Final-EcR-Plant-3	40	14	54	74.0741
EcR	3	Final-EcR-Plant-4	43	9	52	82.6923
EcR	3	Final-EcR-Plant-5	30	21	51	58.8235
EcR	3	Final-EcR-Plant-6	34	20	54	62.963
EcR	3	Final-EcR-Plant-7	29	38	67	43.2836
EcR	3	Final-EcR-Plant-8	64	81	145	44.1379
EcR	3	Final-EcR-Plant-9	119	60	179	66.4804
NC	3	Final-NC-Plant-1	13	14	27	48.1481
NC	3	Final-NC-Plant-2	22	13	35	62.8571
NC	3	Final-NC-Plant-3	41	12	53	77.3585
NC	3	Final-NC-Plant-4	34	16	50	68
NC	3	Final-NC-Plant-5	38	15	53	71.6981
NC	3	Final-NC-Plant-6	56	5	61	91.8033
NC	3	Final-NC-Plant-7	66	60	126	52.381
NC	3	Final-NC-Plant-8	53	66	119	44.5378
NC	3	Final-NC-Plant-9	82	54	136	60.2941

## Sheet: Figure_5B
Condition	Day	Plant	Wing	Nonwing	Total	Percent
E2C	6	Final-E2C-Plant-1	0	31	31	0
E2C	6	Final-E2C-Plant-2	0	16	16	0
E2C	6	Final-E2C-Plant-3	0	19	19	0
EcR	6	Final-EcR-Plant-1	1	24	25	0.04
EcR	6	Final-EcR-Plant-2	0	25	25	0
EcR	6	Final-EcR-Plant-3	0	19	19	0
EcR	6	Final-EcR-Plant-4	0	17	17	0
EcR	6	Final-EcR-Plant-5	0	19	19	0
EcR	6	Final-EcR-Plant-6	0	20	20	0
EcR	6	Final-EcR-Plant-7	0	23	23	0
EcR	6	Final-EcR-Plant-8	1	18	19	0.0526316
EcR	6	Final-EcR-Plant-9	0	13	13	0
E2C	7	Final-E2C-Plant-1	0	11	11	0
E2C	7	Final-E2C-Plant-2	0	12	12	0
E2C	7	Final-E2C-Plant-3	0	9	9	0
EcR	7	Final-EcR-Plant-1	0	18	18	0
EcR	7	Final-EcR-Plant-2	0	25	25	0
EcR	7	Final-EcR-Plant-3	0	9	9	0
EcR	7	Final-EcR-Plant-4	0	9	9	0
EcR	7	Final-EcR-Plant-5	0	18	18	0
EcR	7	Final-EcR-Plant-6	0	28	28	0
EcR	7	Final-EcR-Plant-7	0	26	26	0
EcR	7	Final-EcR-Plant-8	0	18	18	0
EcR	7	Final-EcR-Plant-9	0	5	5	0
E2C	8	Final-E2C-Plant-1	0	2	2	0
E2C	8	Final-E2C-Plant-2	0	8	8	0
E2C	8	Final-E2C-Plant-3	0	13	13	0
EcR	8	Final-EcR-Plant-1	1	18	19	0.0526316
EcR	8	Final-EcR-Plant-2	0	23	23	0
EcR	8	Final-EcR-Plant-3	0	6	6	0
EcR	8	Final-EcR-Plant-4	0	8	8	0
EcR	8	Final-EcR-Plant-5	0	11	11	0
EcR	8	Final-EcR-Plant-6	0	17	17	0
EcR	8	Final-EcR-Plant-7	0	17	17	0
EcR	8	Final-EcR-Plant-8	0	19	19	0
EcR	8	Final-EcR-Plant-9	0	4	4	0

[truncated: 8 more sheets: Fig_6_Raw_Ct_values, Fig_6A, Fig_6B, Fig_6C, Fig_6D, Fig_6E, Fig_6F, Fig_6G]
